# Supplementary material for: Mitochondrial Genomes of the Genus Claassenia (Plecoptera: Perlidae) and Phylogenetic Assignment to Subfamily Perlinae
Source: MDPI journal article supplement (doi:10.3390/genes12121986), 2021-12-14
Supplement: s1 [file s1]

**Table S1.** Organization of the *C. magna* mitogenome.

| Gene                 | Position (bp) | Size (bp) | Direction | Intergenic Nucleotides (IGN) | Anti- or Start/Stop Codons | A+T % |
|----------------------|---------------|-----------|-----------|------------------------------|----------------------------|-------|
| <i>trnIle</i> (I)    | 1–65          | 65        | Forward   | 0                            | AAT                        | 63.08 |
| <i>trnGln</i> (Q)    | 63–131        | 69        | Reverse   | –3                           | TAT                        | 65.22 |
| <i>trnMet</i> (M)    | 144–213       | 70        | Forward   | 12                           | AGA                        | 58.57 |
| <i>nad2</i>          | 214–1248      | 1035      | Forward   | 0                            | ATG/TAA                    | 58.72 |
| <i>trnTrp</i> (W)    | 1247–1314     | 68        | Forward   | –2                           | AAG                        | 70.59 |
| <i>trnCys</i> (C)    | 1319–1388     | 70        | Reverse   | 4                            | AGC                        | 65.72 |
| <i>trnTyr</i> (Y)    | 1389–1454     | 66        | Reverse   | 0                            | GGT                        | 54.55 |
| <i>cox1</i>          | 1464–2996     | 1533      | Forward   | 9                            | CAA/TAA                    | 53.72 |
| <i>trnLeu2</i> (UUR) | 2992–3055     | 64        | Forward   | –5                           | TCT                        | 67.19 |
| <i>cox2</i>          | 3059–3746     | 688       | Forward   | 3                            | ATG/T-                     | 57.21 |
| <i>trnLys</i> (K)    | 3747–3816     | 70        | Forward   | 0                            | CAT                        | 64.29 |
| <i>trnAsp</i> (D)    | 3817–3883     | 67        | Forward   | 0                            | AAA                        | 76.12 |
| <i>atp8</i>          | 3884–4045     | 162       | Forward   | 0                            | ATG/TAA                    | 66.67 |
| <i>atp6</i>          | 4039–4716     | 678       | Forward   | –7                           | ATG/TAA                    | 58.96 |
| <i>cox3</i>          | 4716–5504     | 789       | Forward   | –1                           | ATG/TAA                    | 55.73 |
| <i>trnGly</i> (G)    | 5506–5574     | 69        | Forward   | 1                            | ATT                        | 71.01 |
| <i>nad3</i>          | 5584–5928     | 345       | Forward   | 9                            | ATA/TAA                    | 58.19 |
| <i>trnAla</i> (A)    | 5933–5999     | 67        | Forward   | 4                            | GGG                        | 68.66 |
| <i>trnArg</i> (R)    | 6004–6068     | 65        | Forward   | 4                            | AAG                        | 66.16 |
| <i>trnAsn</i> (N)    | 6068–6132     | 65        | Forward   | –1                           | TTA                        | 63.07 |
| <i>trnSer1</i> (AGN) | 6133–6199     | 67        | Forward   | 0                            | GAA                        | 64.18 |
| <i>trnGlu</i> (E)    | 6202–6266     | 65        | Forward   | 2                            | ATT                        | 83.08 |
| <i>trnPhe</i> (F)    | 6267–6336     | 70        | Reverse   | 0                            | GTT                        | 62.86 |
| <i>nad5</i>          | 6337–8071     | 1735      | Reverse   | 0                            | GTG/T-                     | 62.57 |
| <i>trnHis</i> (H)    | 8072–8145     | 74        | Reverse   | 0                            | ACT                        | 67.57 |
| <i>nad4</i>          | 8145–9485     | 1341      | Reverse   | –1                           | GTG/TAA                    | 62.7  |
| <i>nad4l</i>         | 9479–9775     | 297       | Reverse   | –7                           | ATG/TAA                    | 68.37 |
| <i>trnThr</i> (T)    | 9778–9844     | 67        | Forward   | 2                            | GTT                        | 76.12 |
| <i>trnPro</i> (P)    | 9846–9911     | 66        | Reverse   | 1                            | CAG                        | 66.67 |
| <i>nad6</i>          | 9925–10437    | 513       | Forward   | 13                           | ATT/TAA                    | 59.88 |
| <i>Cytb</i>          | 10437–11573   | 1137      | Forward   | –1                           | ATG/TAG                    | 55.38 |
| <i>trnSer2</i> (UCN) | 11572–11641   | 70        | Forward   | –2                           | AGT                        | 75.71 |
| <i>nad1</i>          | 11658–12581   | 924       | Reverse   | 16                           | GTG/TAG                    | 64.17 |
| <i>trnLeu1</i> (CUN) | 12610–12676   | 67        | Reverse   | 28                           | TCT                        | 62.69 |
| <i>rrnL</i>          | 12637–14001   | 1365      | Reverse   | –40                          |                            | 65.27 |
| <i>trnVal</i> (V)    | 14034–14105   | 72        | Reverse   | 32                           | CGA                        | 61.11 |
| <i>rrnS</i>          | 14107–14942   | 836       | Reverse   | 1                            |                            | 62.32 |
| CR                   | 14943–15774   | 832       |           | 0                            |                            | 71.51 |

**Table S2.** Organization of the *Claassenia* sp. 2 mitogenome.

| Gene              | Position (bp) | Size (bp) | Direction | Intergenic Nucleotides (IGN) | Anti- or Start/Stop Codons | A+T % |
|-------------------|---------------|-----------|-----------|------------------------------|----------------------------|-------|
| <i>trnIle</i> (I) | 1–66          | 66        | Forward   | 0                            | AAT                        | 68.18 |

|                      |             |      |         |     |         |       |
|----------------------|-------------|------|---------|-----|---------|-------|
| <i>trnGln</i> (Q)    | 64–132      | 69   | Reverse | –3  | TAT     | 71.01 |
| <i>trnMet</i> (M)    | 143–210     | 68   | Forward | 10  | AGA     | 60.29 |
| <i>nad2</i>          | 214–1245    | 1032 | Forward | 3   | ATC/TAA | 65.89 |
| <i>trnTrp</i> (W)    | 1244–1310   | 67   | Forward | –2  | AAG     | 73.14 |
| <i>trnCys</i> (C)    | 1303–1370   | 68   | Reverse | –8  | AGC     | 63.23 |
| <i>trnTyr</i> (Y)    | 1371–1437   | 67   | Reverse | 0   | GGT     | 59.71 |
| <i>cox1</i>          | 1430–2974   | 1545 | Forward | –8  | ATT/TAA | 60.51 |
| <i>trnLeu2</i> (UUR) | 2970–3033   | 64   | Forward | –5  | TCT     | 64.06 |
| <i>cox2</i>          | 3038–3725   | 688  | Forward | 4   | ATG/T-  | 60.41 |
| <i>trnLys</i> (K)    | 3726–3795   | 70   | Forward | 0   | CAT     | 65.72 |
| <i>trnAsp</i> (D)    | 3796–3864   | 69   | Forward | 0   | AAA     | 78.26 |
| <i>atp8</i>          | 3865–4026   | 162  | Forward | 0   | ATC/TAA | 66.04 |
| <i>atp6</i>          | 4020–4697   | 678  | Forward | –7  | ATG/TAA | 61.78 |
| <i>cox3</i>          | 4697–5485   | 789  | Forward | –1  | ATG/TAA | 59.16 |
| <i>trnGly</i> (G)    | 5485–5551   | 67   | Forward | –1  | ATC     | 74.63 |
| <i>nad3</i>          | 5552–5905   | 354  | Forward | 0   | ATG/TAA | 61.54 |
| <i>trnAla</i> (A)    | 5910–5976   | 67   | Forward | 4   | GGG     | 73.14 |
| <i>trnArg</i> (R)    | 5981–6046   | 66   | Forward | 4   | AAG     | 65.15 |
| <i>trnAsn</i> (N)    | 6046–6111   | 66   | Forward | –1  | TTA     | 65.15 |
| <i>trnSer1</i> (AGN) | 6112–6178   | 67   | Forward | 0   | GAA     | 64.18 |
| <i>trnGlu</i> (E)    | 6181–6245   | 65   | Forward | 2   | ATT     | 87.7  |
| <i>trnPhe</i> (F)    | 6245–6316   | 72   | Reverse | –1  | ACT     | 68.05 |
| <i>nad5</i>          | 6317–8051   | 1735 | Reverse | 0   | GTG/T-  | 67.64 |
| <i>trnHis</i> (H)    | 8052–8123   | 72   | Reverse | 0   | ACT     | 69.45 |
| <i>nad4</i>          | 8124–9462   | 1339 | Reverse | 0   | ATG/T-  | 67.34 |
| <i>nad4l</i>         | 9456–9752   | 297  | Reverse | –7  | ATG/TAA | 72.11 |
| <i>trnThr</i> (T)    | 9755–9821   | 67   | Forward | 2   | GTT     | 77.61 |
| <i>trnPro</i> (P)    | 9823–9887   | 65   | Reverse | 1   | CAG     | 66.15 |
| <i>nad6</i>          | 9889–10413  | 525  | Forward | 1   | ATT/TAA | 63.41 |
| <i>Cytb</i>          | 10413–11549 | 1137 | Forward | –1  | ATG/TAG | 61.02 |
| <i>trnSer2</i> (UCN) | 11548–11618 | 71   | Forward | –2  | AGT     | 74.65 |
| <i>nad1</i>          | 11636–12586 | 951  | Reverse | 17  | TTG     | 66.77 |
| <i>trnLeu1</i> (CUN) | 12588–12654 | 67   | Reverse | 1   | TCT     | 67.17 |
| <i>rrnL</i>          | 12613–14004 | 1392 | Reverse | –42 |         | 69.68 |
| <i>trnVal</i> (V)    | 14006–14077 | 72   | Reverse | 1   | CAA     | 55.55 |
| <i>rrnS</i>          | 14079–14908 | 830  | Reverse | 1   |         | 67.95 |
| CR                   | 14909–15777 | 869  |         | 0   |         | 74.45 |

**Table S3.** Organization of the *C. xucheni* mitogenome.

| Gene                 | Position (bp) | Size (bp) | Direction | Intergenic Nucleotides (IGN) | Anti- or Start/Stop Codons | A+T % |
|----------------------|---------------|-----------|-----------|------------------------------|----------------------------|-------|
| <i>trnIle</i> (I)    | 1–66          | 66        | Forward   | 0                            | AAT                        | 60.6  |
| <i>trnGln</i> (Q)    | 64–132        | 69        | Reverse   | –3                           | TAT                        | 69.56 |
| <i>trnMet</i> (M)    | 144–213       | 70        | Forward   | 11                           | AGA                        | 61.43 |
| <i>nad2</i>          | 217–1248      | 1032      | Forward   | 3                            | ATC/TAA                    | 60.35 |
| <i>trnTrp</i> (W)    | 1247–1313     | 67        | Forward   | –2                           | AAG                        | 73.14 |
| <i>trnCys</i> (C)    | 1306–1373     | 68        | Reverse   | –8                           | AGC                        | 60.29 |
| <i>trnTyr</i> (Y)    | 1374–1438     | 65        | Reverse   | 0                            | GGT                        | 63.08 |
| <i>cox1</i>          | 1431–2975     | 1545      | Forward   | –8                           | ATT/TAA                    | 56.49 |
| <i>trnLeu2</i> (UUR) | 2971–3034     | 64        | Forward   | –5                           | TCT                        | 64.06 |
| <i>cox2</i>          | 3039–3726     | 688       | Forward   | 4                            | ATG/T-                     | 56.63 |

---

|                      |             |      |         |     |         |       |
|----------------------|-------------|------|---------|-----|---------|-------|
| <i>trnLys</i> (K)    | 3727–3796   | 70   | Forward | 0   | CAT     | 65.72 |
| <i>trnAsp</i> (D)    | 3797–3864   | 68   | Forward | 0   | AAA     | 75    |
| <i>atp8</i>          | 3865–4026   | 162  | Forward | 0   | ATT/TAA | 64.78 |
| <i>atp6</i>          | 4020–4697   | 678  | Forward | −7  | ATG/TAA | 59.26 |
| <i>cox3</i>          | 4697–5485   | 789  | Forward | −1  | ATG/TAA | 55.09 |
| <i>trnGly</i> (G)    | 5485–5551   | 67   | Forward | −1  | ACC     | 68.66 |
| <i>nad3</i>          | 5555–5905   | 351  | Forward | 3   | ATA/TAA | 62.07 |
| <i>trnAla</i> (A)    | 5910–5976   | 67   | Forward | 4   | GGG     | 70.15 |
| <i>trnArg</i> (R)    | 5982–6048   | 67   | Forward | 5   | AAG     | 64.18 |
| <i>trnAsn</i> (N)    | 6048–6113   | 66   | Forward | −1  | TTA     | 65.15 |
| <i>trnSer1</i> (AGN) | 6114–6180   | 67   | Forward | 0   | GAA     | 64.18 |
| <i>trnGlu</i> (E)    | 6185–6250   | 66   | Forward | 4   | ATT     | 83.33 |
| <i>trnPhe</i> (F)    | 6250–6321   | 72   | Reverse | −1  | ACT     | 65.27 |
| <i>nad5</i>          | 6322–8020   | 1699 | Reverse | 0   | ATT/T-  | 64.07 |
| <i>trnHis</i> (H)    | 8057–8127   | 71   | Reverse | 36  | ACT     | 70.43 |
| <i>nad4</i>          | 8128–9466   | 1339 | Reverse | 0   | ATG/T-  | 65.85 |
| <i>nad4l</i>         | 9460–9756   | 297  | Reverse | −7  | ATG/TAA | 68.71 |
| <i>trnThr</i> (T)    | 9759–9823   | 65   | Forward | 2   | GTT     | 78.46 |
| <i>trnPro</i> (P)    | 9825–9890   | 66   | Reverse | 1   | CAG     | 68.18 |
| <i>nad6</i>          | 9904–10416  | 513  | Forward | 13  | ATC/TAA | 57.65 |
| <i>Cytb</i>          | 10428–11552 | 1125 | Forward | 11  | ATA/TAG | 57.21 |
| <i>trnSer2</i> (UCN) | 11551–11621 | 71   | Forward | −2  | AGT     | 73.24 |
| <i>nad1</i>          | 11640–12560 | 921  | Reverse | 18  | GTG/TAG | 63.29 |
| <i>trnLeu1</i> (CUN) | 12592–12658 | 67   | Reverse | 31  | TCT     | 62.69 |
| <i>rrnL</i>          | 12636–14006 | 1371 | Reverse | −23 |         | 67.98 |
| <i>trnVal</i> (V)    | 14008–14079 | 72   | Reverse | 1   | CAA     | 56.94 |
| <i>rrnS</i>          | 14081–14913 | 833  | Reverse | 1   |         | 65.54 |
| CR                   | 14914–15746 | 832  |         | 0   |         | 73.95 |

---





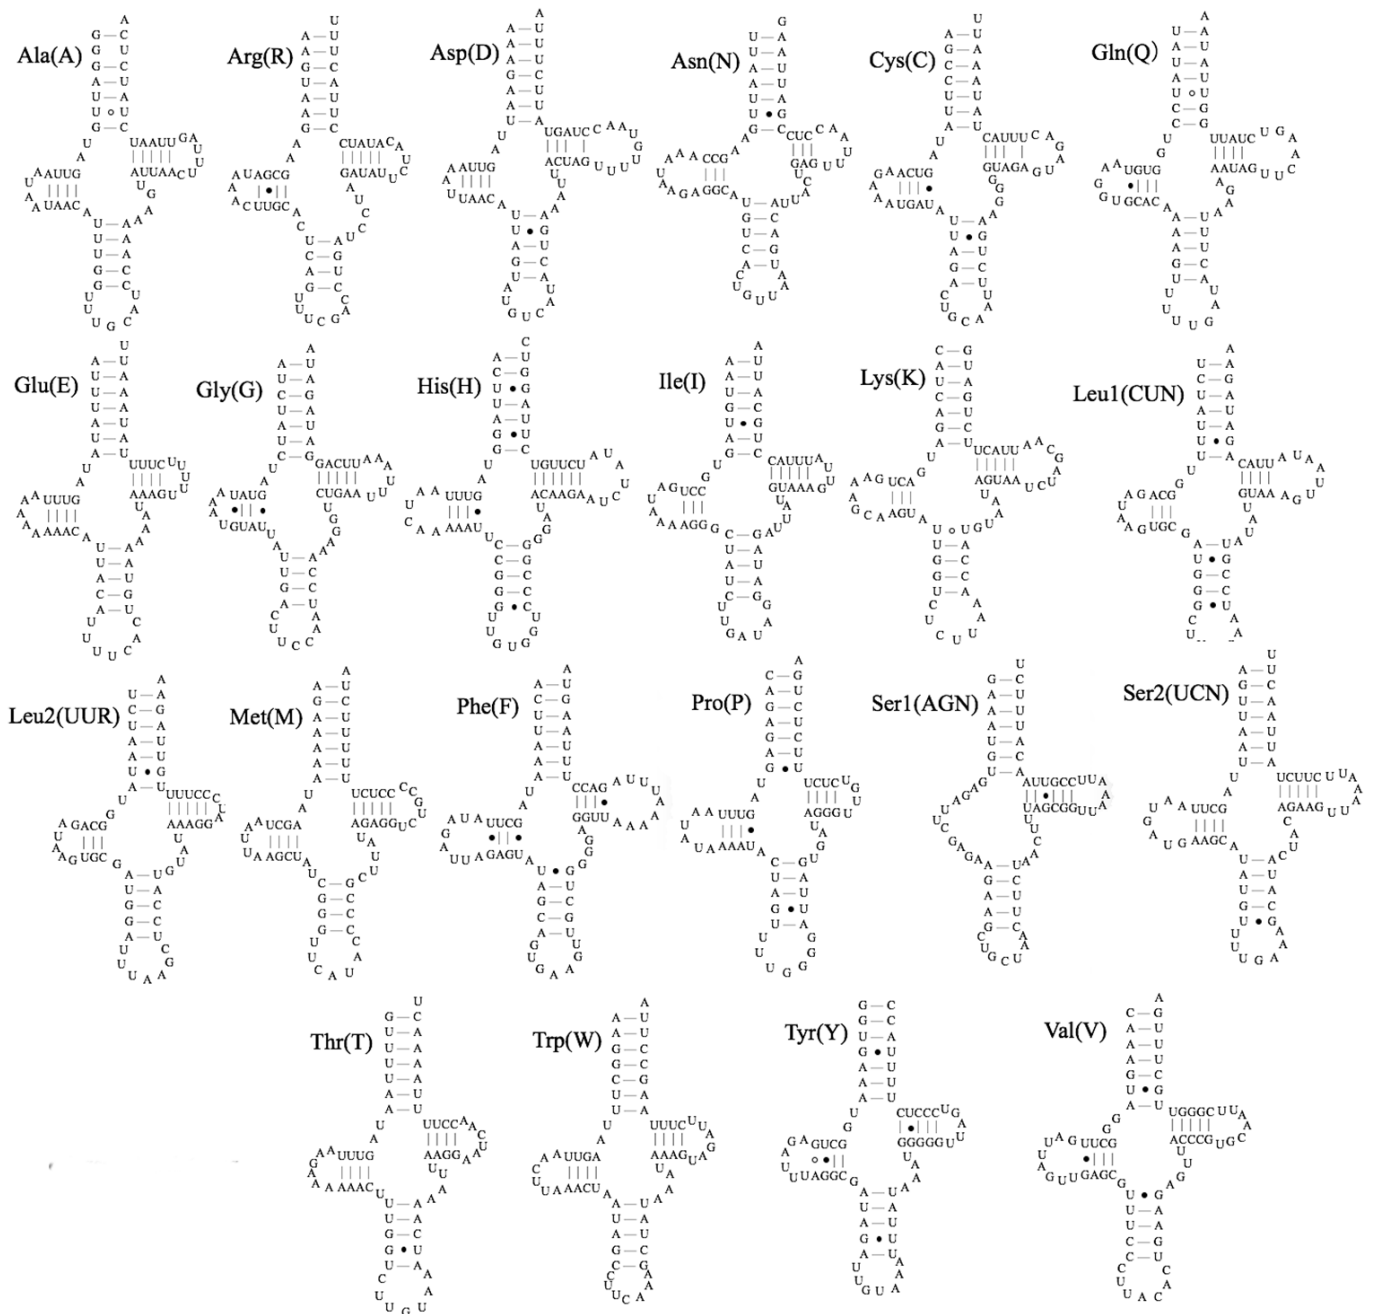

### *Claassenia* sp.2

**Figure S3.** Predicted secondary structures of tRNAs in *claassenia* sp.2. The tRNAs are labelled with abbreviations of their corresponding amino acids.

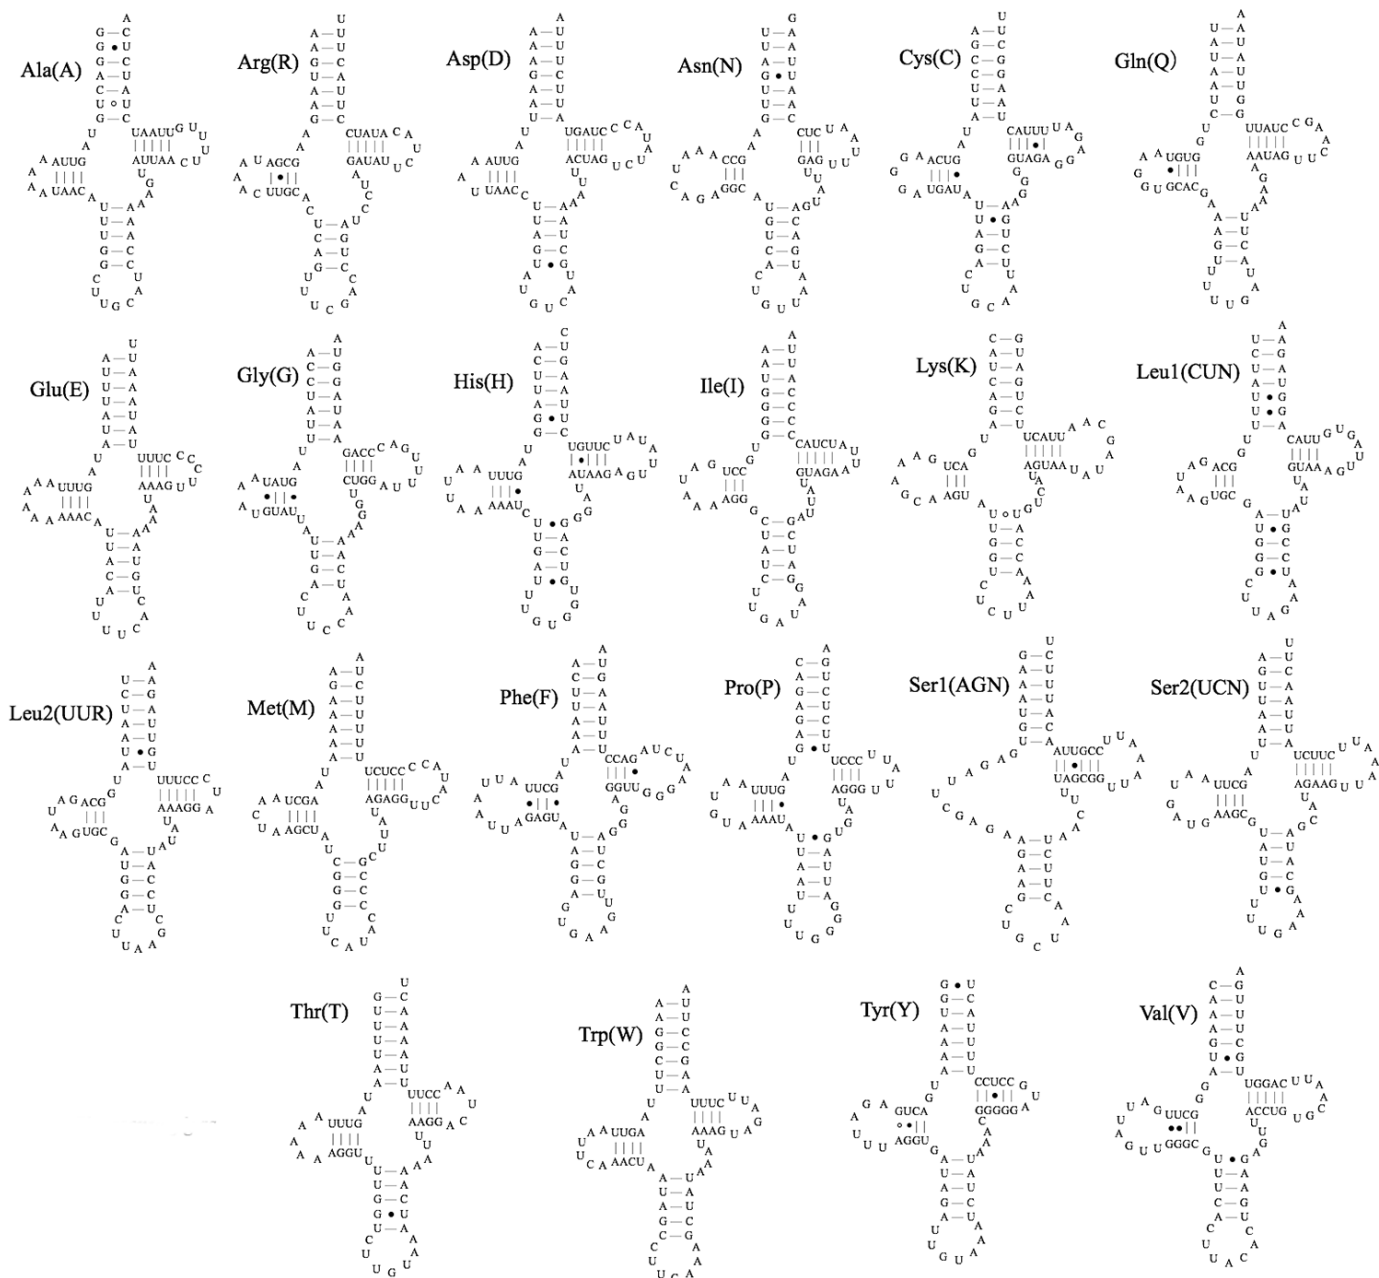

### *Claassenia xucheni*

**Figure S4.** Predicted secondary structures of tRNAs in in *C. xucheni*. The tRNAs are labelled with abbreviations of their corresponding amino acids.
